# Supplementary material
Source: publisher figshare collection journal article supplement (https://frontiersin.figshare.com/ndownloader/files/24172613)
Supplement: Supplementary file [file 24172613]

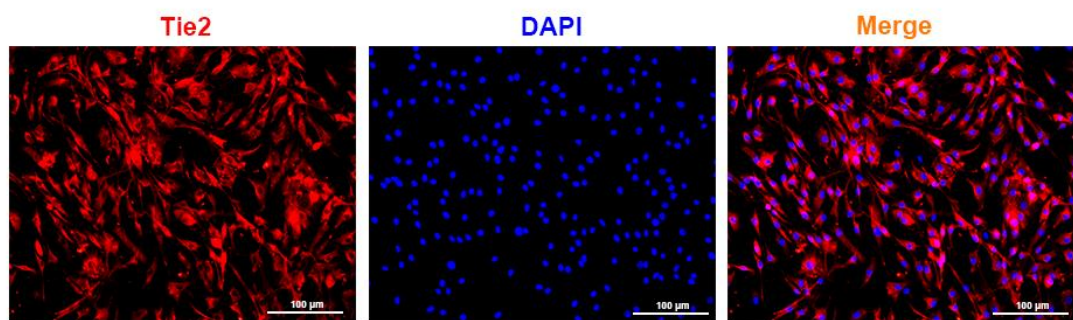

**Supplementary Figure 1.** The purity of NPSCs identified by Tie2 staining. The images show the typical fluorescence photomicrograph of Tie2 staining of NPSCs (original magnification:  $\times 200$ ). The rate of Tie2-positive cells was  $95.91 \pm 1.425\%$ .

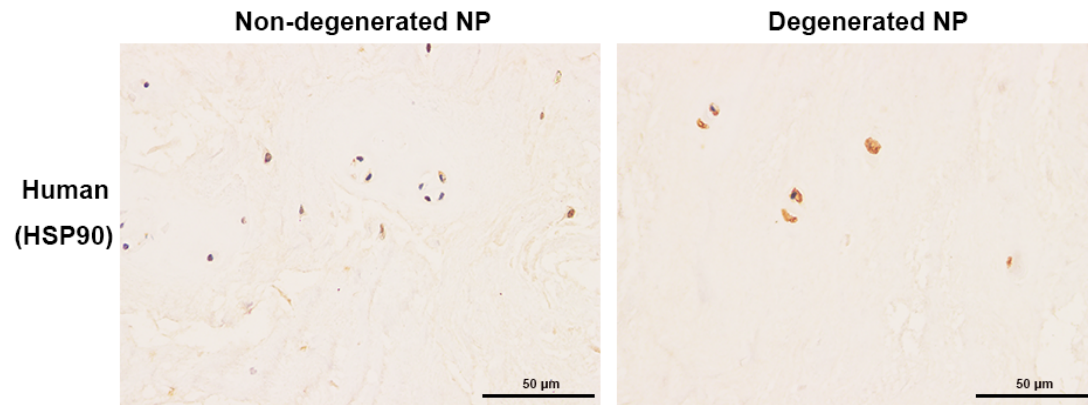

**Supplementary Figure 2.** IHC staining of HSP90 in non-degenerated (37 years old, male, grade II) and degenerated (43 years old, male, grade IV) human NP tissues (original magnification:  $\times 400$ ).

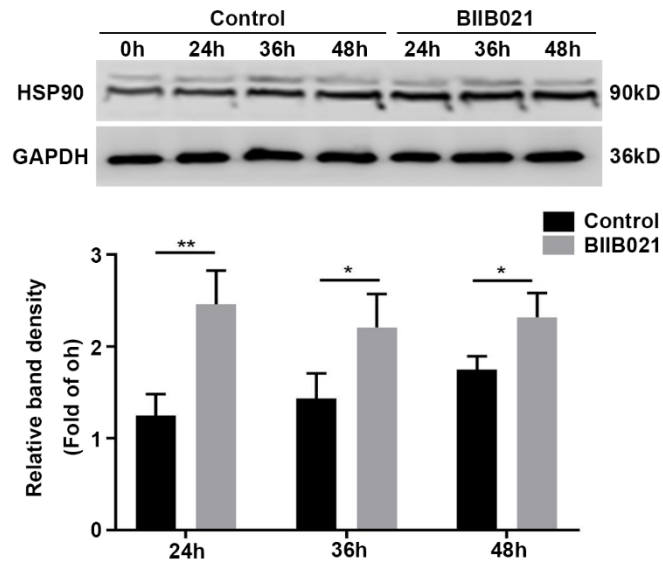

**Supplementary Figure 3.** Representative WB graphs and quantitation of the expression levels of HSP90. The data were expressed as mean  $\pm$  SD from three independent experiments, and they were analyzed by a two-tailed t-test. (\* $P$  < 0.05, \*\* $P$  < 0.01 vs. control).

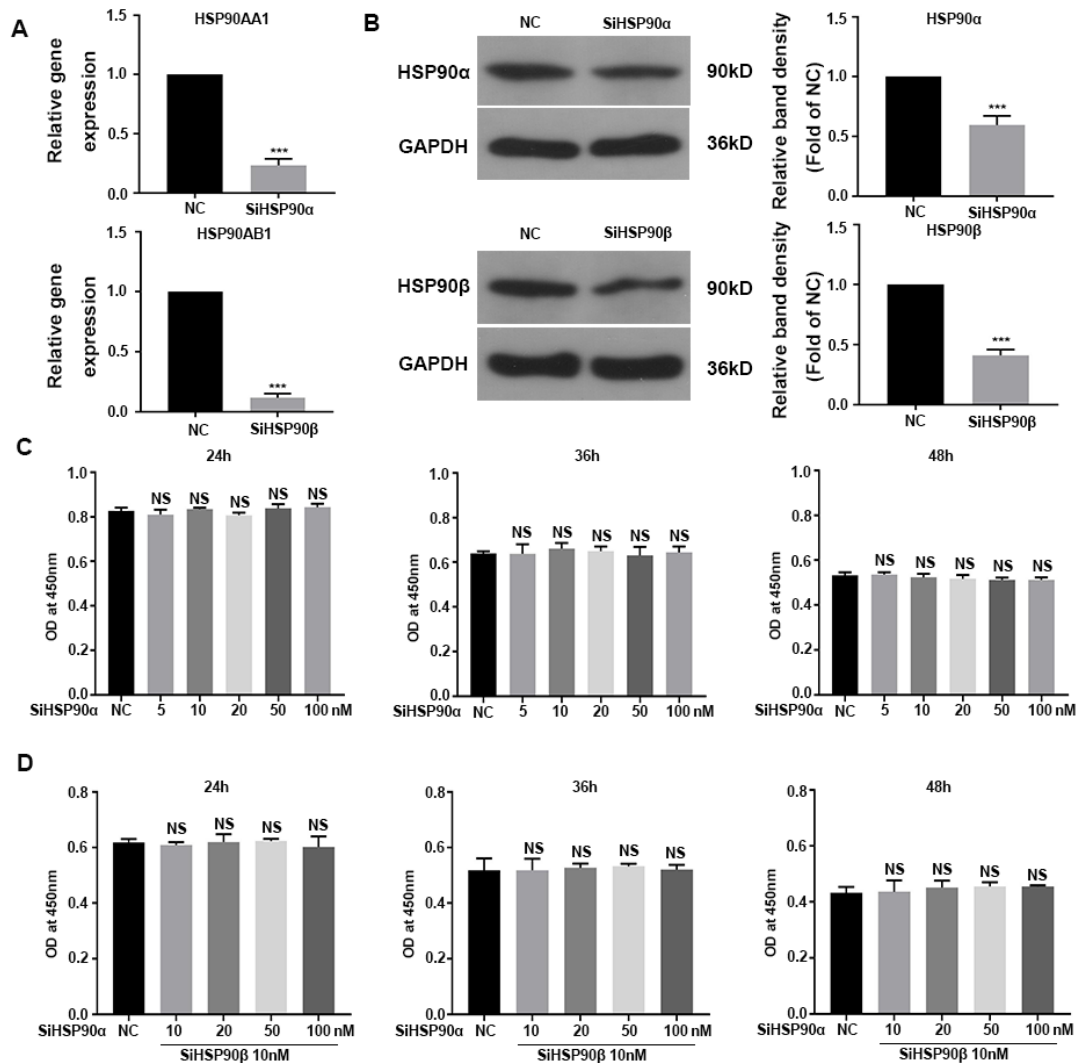

**Supplementary Figure 4.** Transfection of NPSCs with HSP90α siRNA or both the HSP90α and HSP90β siRNAs has no significant influence on cell viability. **(A)** The transfection efficacy of HSP90α (100nM) and HSP90β (10 nM) siRNAs was validated by RT-PCR. **(B)** Representative WB graphs and quantitation of the expression levels of HSP90α and HSP90β. **(C)** The effects of SiHSP90α on cell viability of NPSCs exposed to 24 h, 36 h and 48 h compression measured by CCK-8 assays. **(D)** The effects of co-transfection of SiHSP90β (10 nM) and different concentrations of SiHSP90α on cell viability of NPSCs exposed to 24 h, 36 h and 48 h compression measured by CCK-8 assays. The data were expressed as mean  $\pm$  SD from at least three independent experiments, and they were analyzed by a two-tailed t-test. (\*\*\*)  $P < 0.001$  vs. NC, NS, not significant)

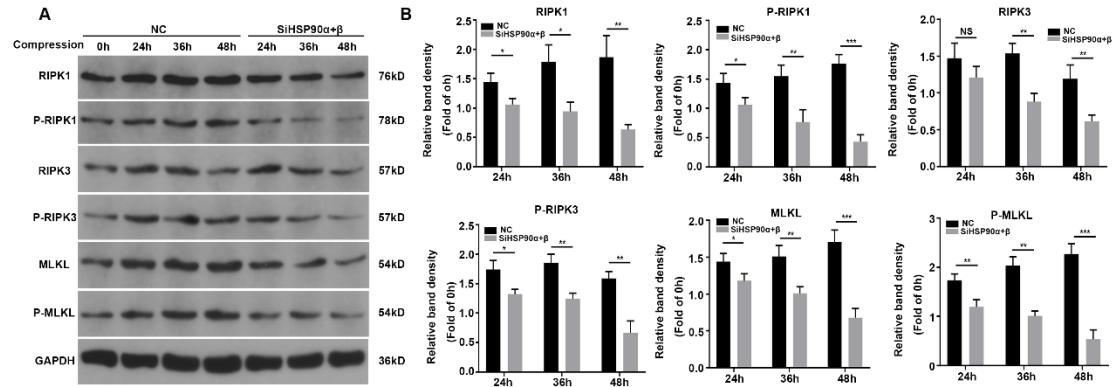

**Supplementary Figure 5.** The effects of HSP90 specific siRNAs on the expression of core necroptosis regulators. **(A-B)** Representative WB graphs and quantitation of the expression levels of RIPK1, P-RIPK1, RIPK3, P-RIPK3, MLKL and P-MLKL. The data were expressed as mean  $\pm$  SD from three independent experiments, and they were analyzed by a two-tailed t-test. (\* $P$  < 0.05, \*\* $P$  < 0.01, \*\*\* $P$  < 0.001 vs. NC, NS, not significant).
